# Supplementary material
Source: Springer Nature journal article supplement (https://www.springermedizin.de/resource/supplementary/13075_2010_9733_MOESM1_ESM.pdf/9693608)

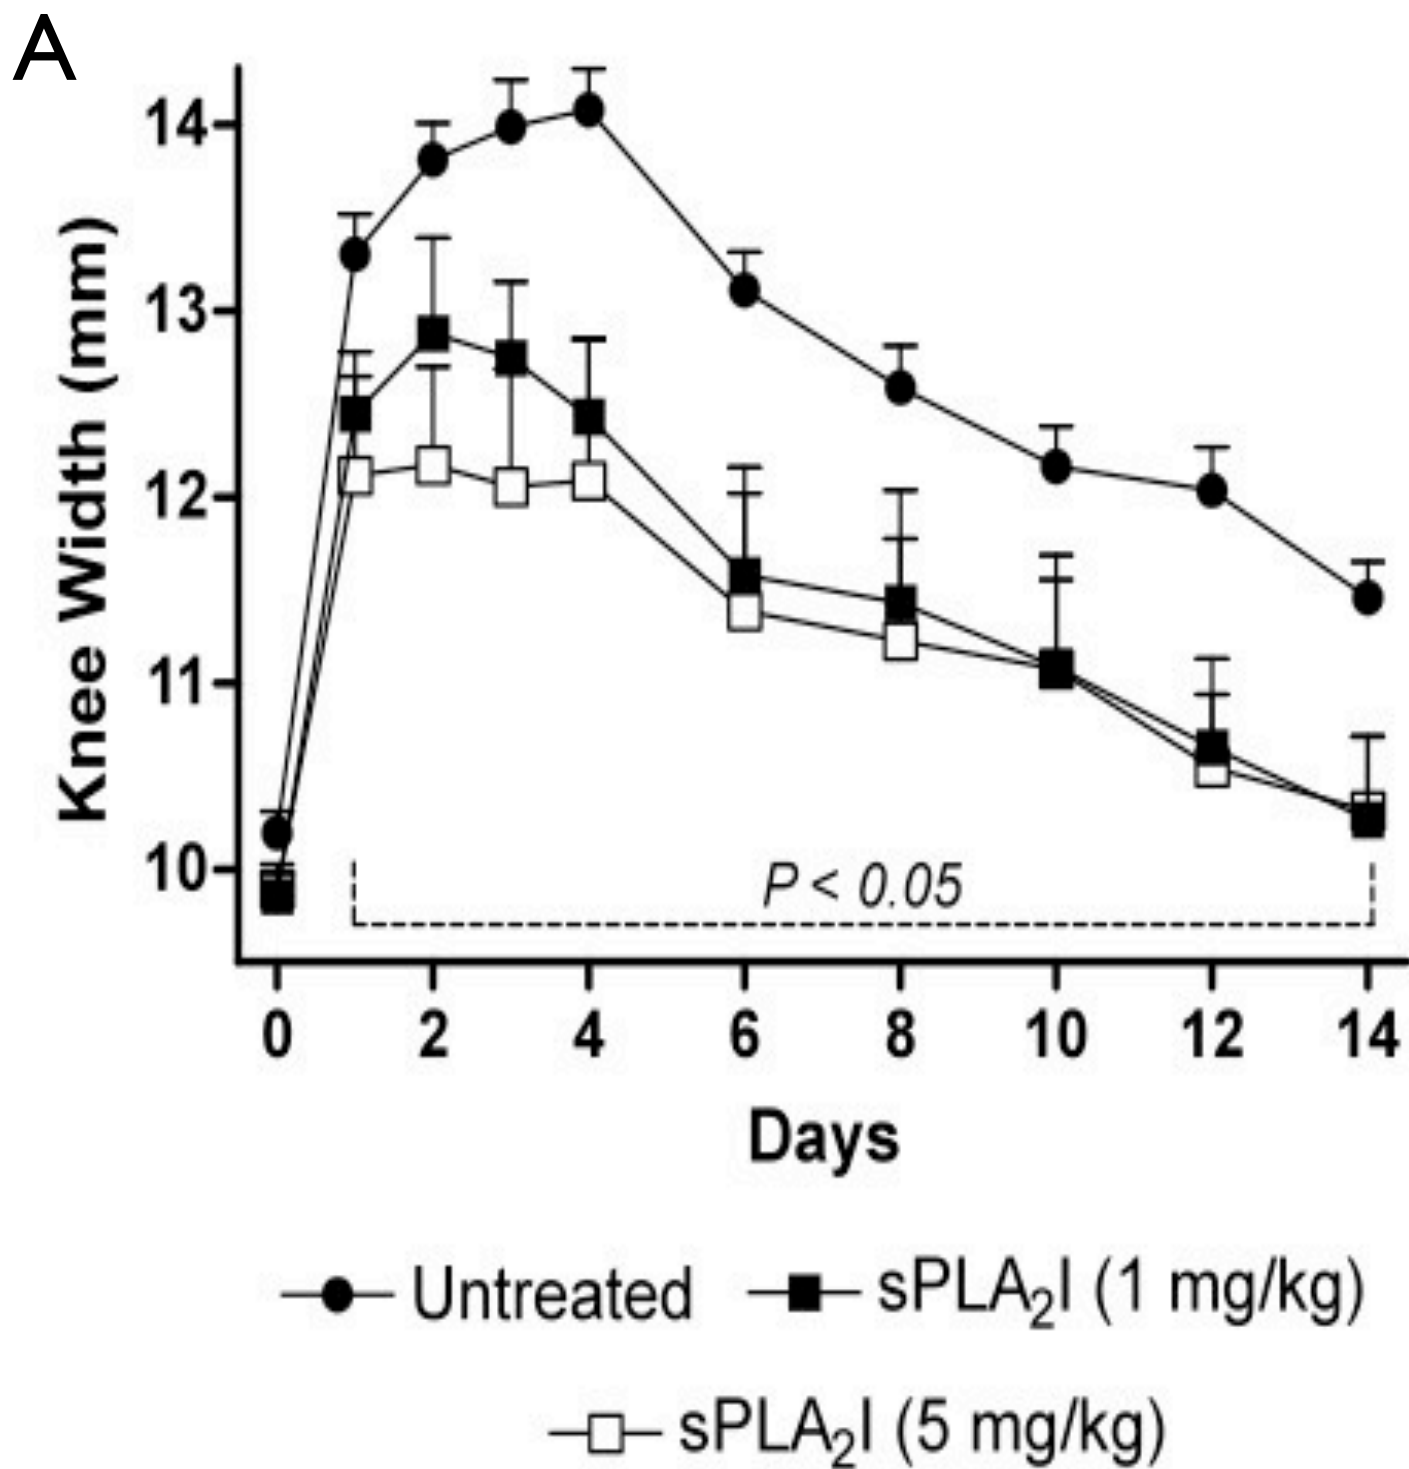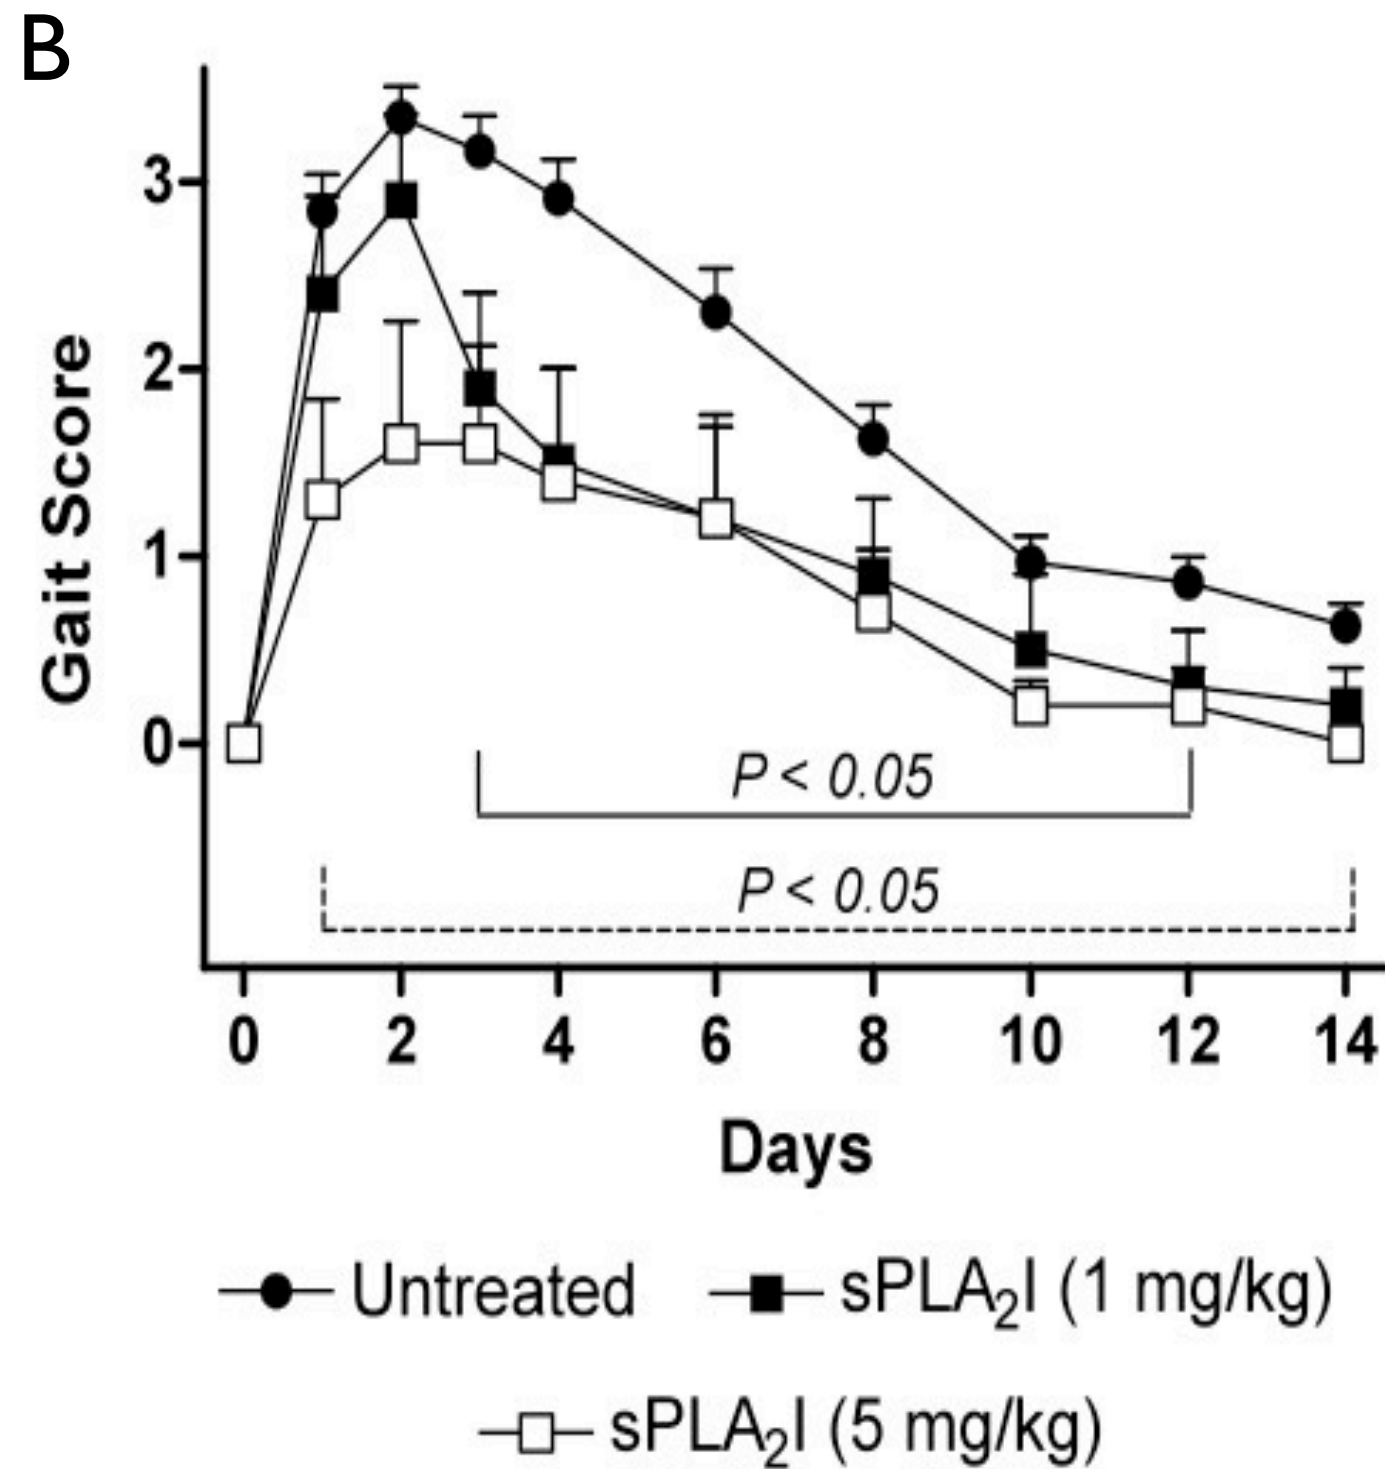

Supplement: MOESM1 [file 9693608]
